# Supplementary material for: Comparative analysis of human induced pluripotent stem cell‐derived mesenchymal stem cells and umbilical cord mesenchymal stem cells
Source: PubMed Central journal article supplement (PMC8435459; doi:10.1111/jcmm.16851), 2021-08-13

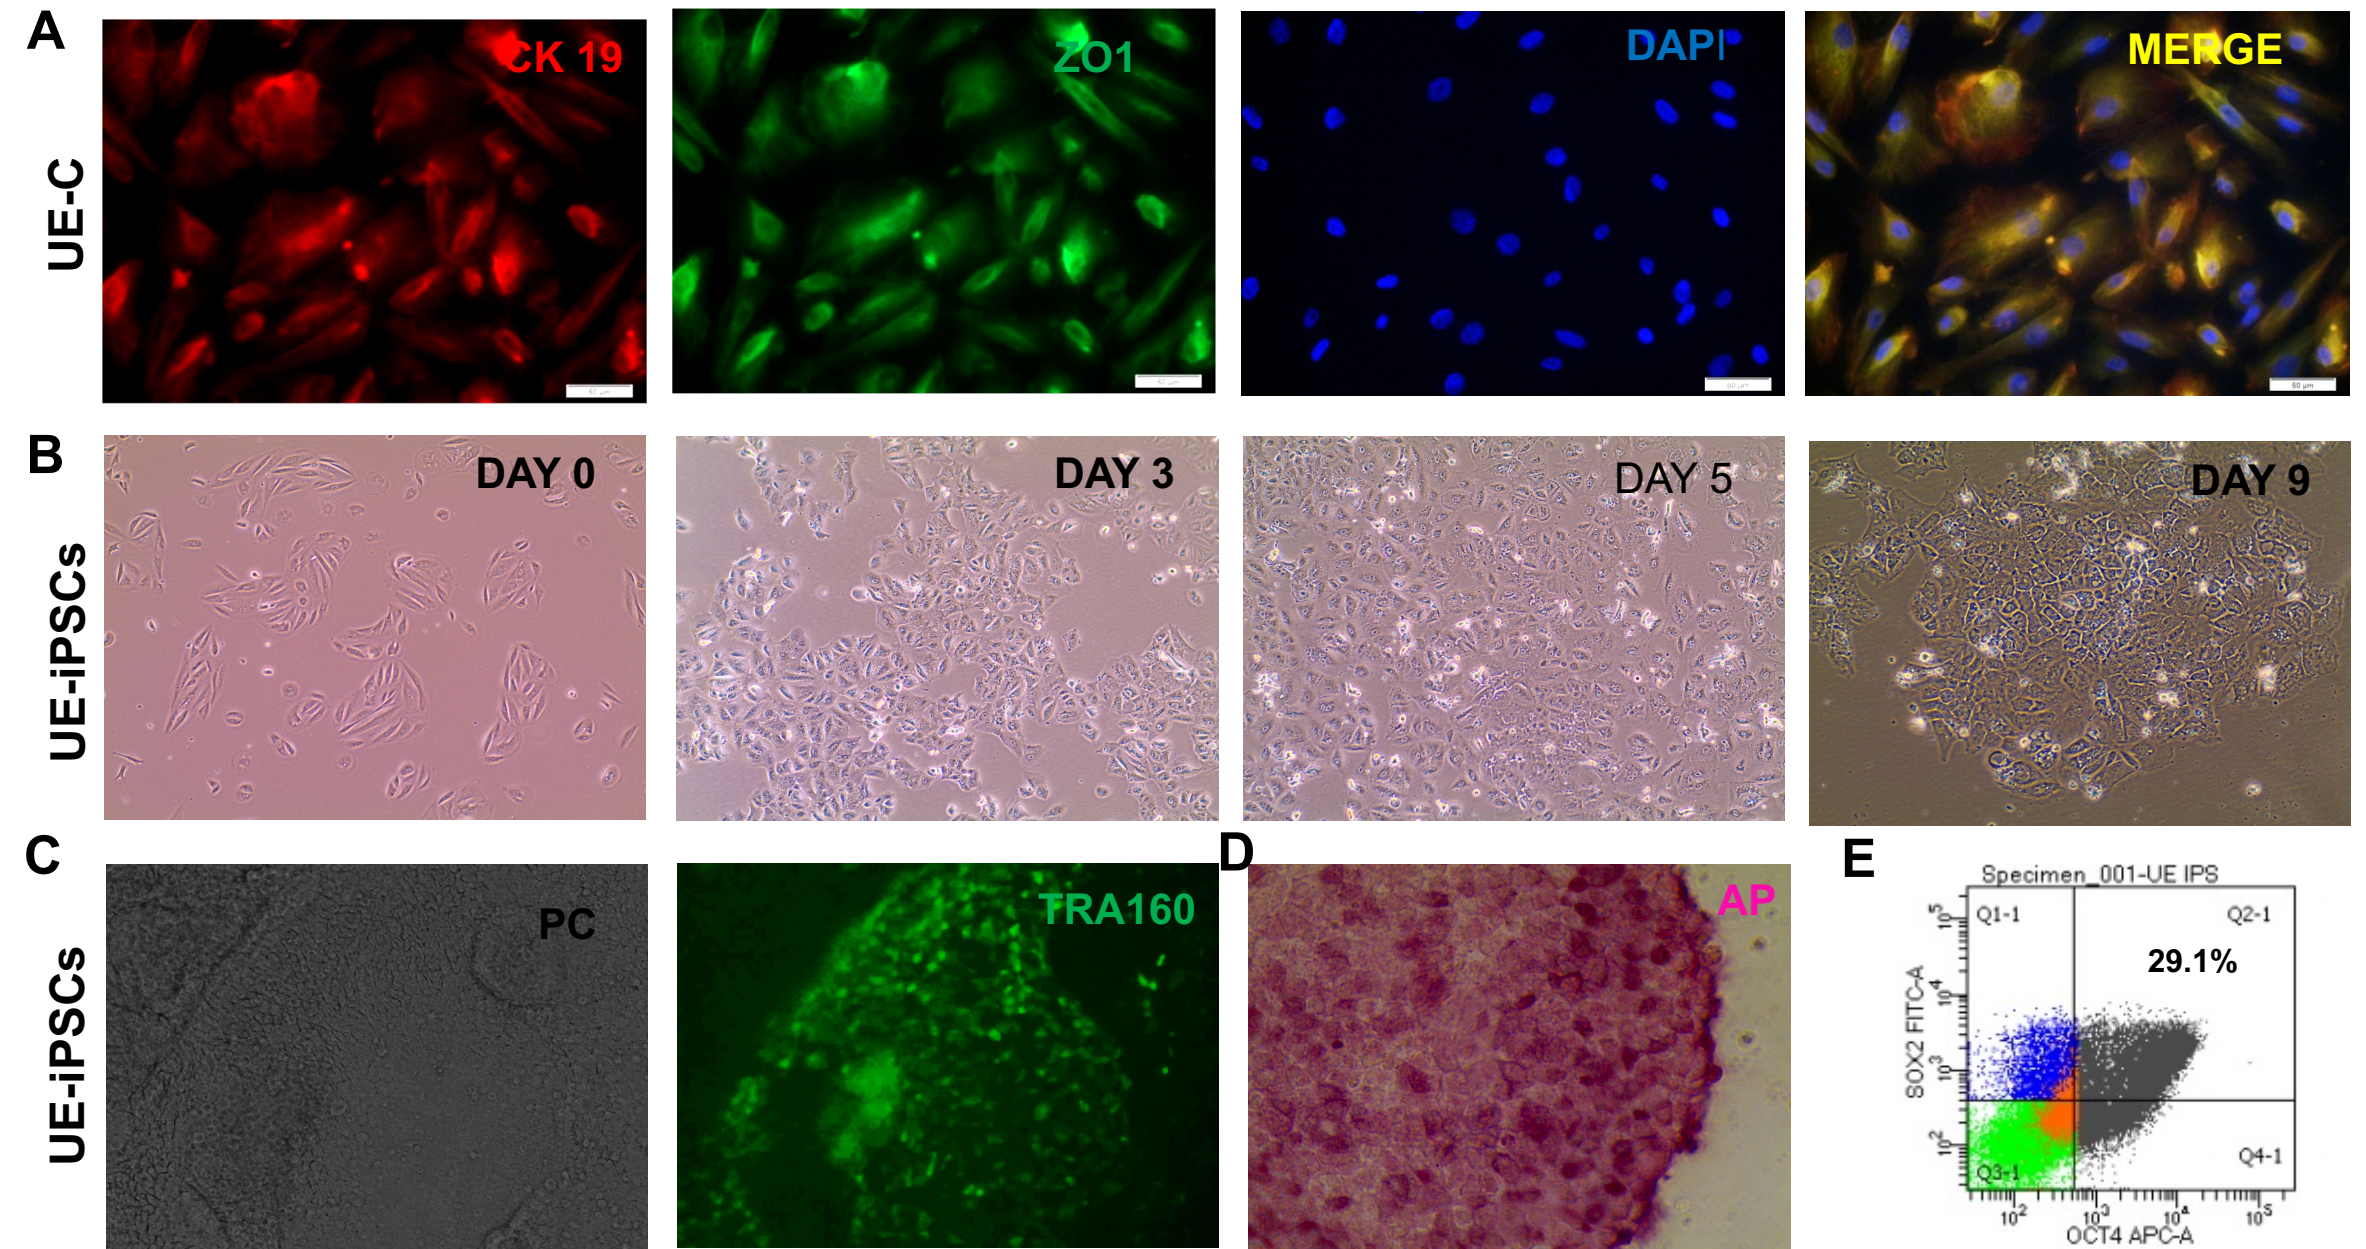

Supplementary Figure S1

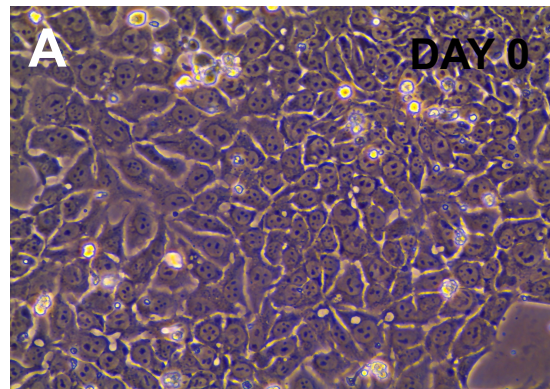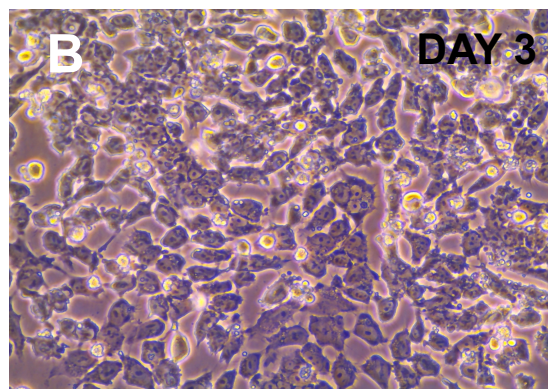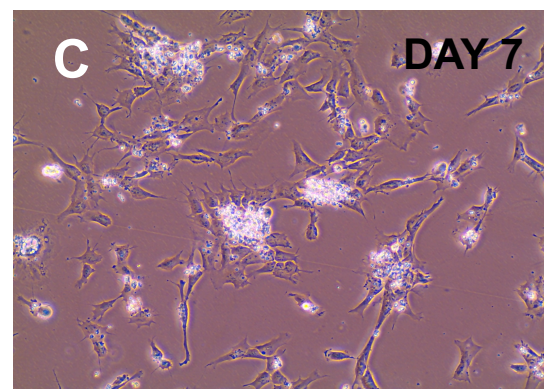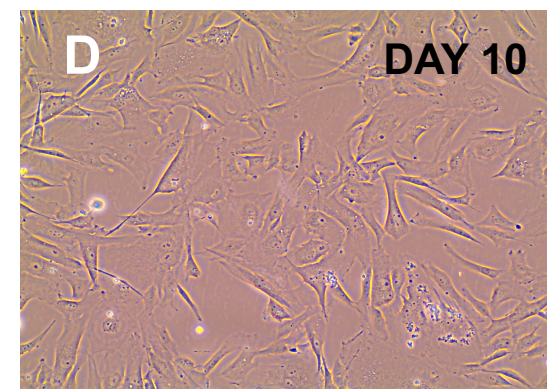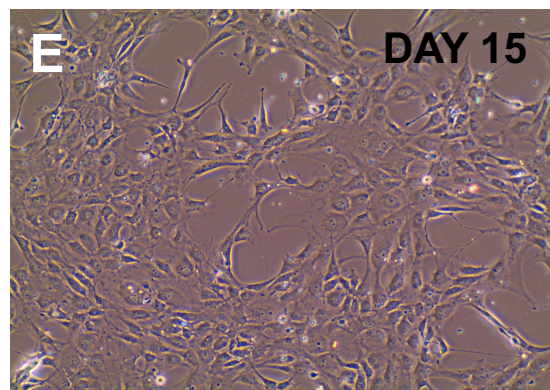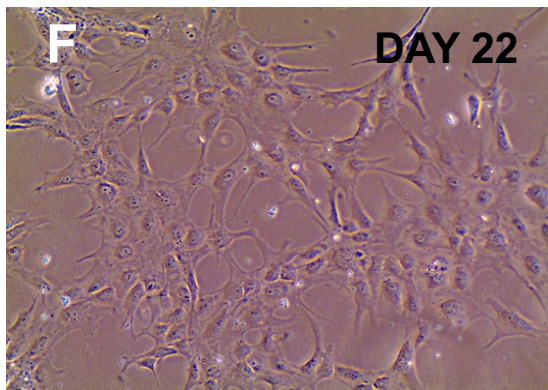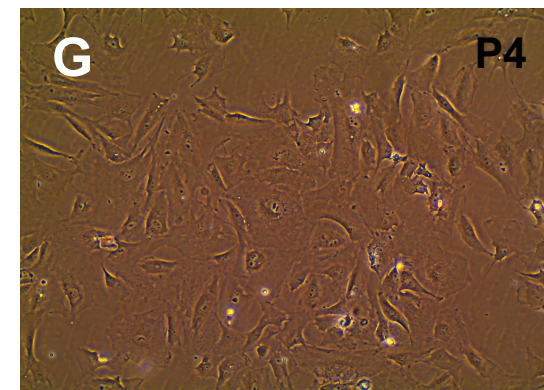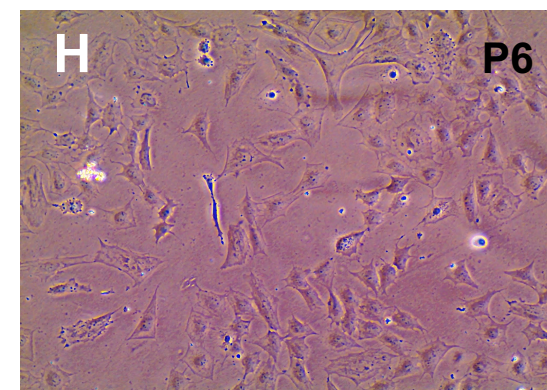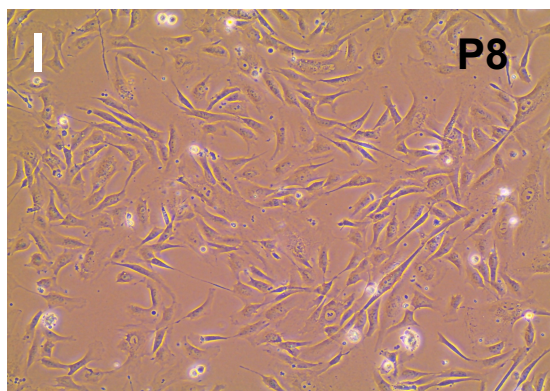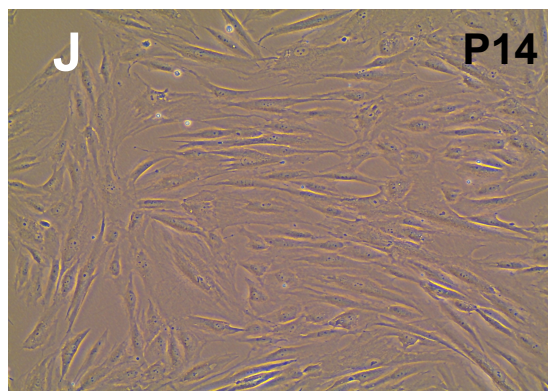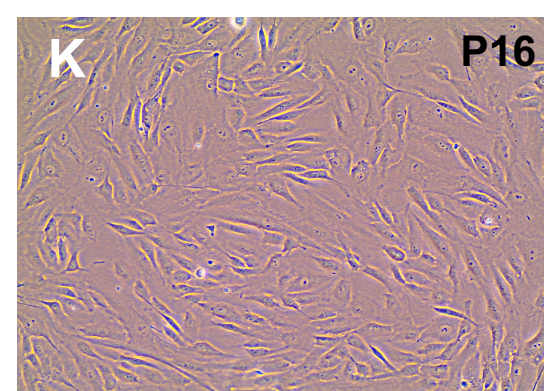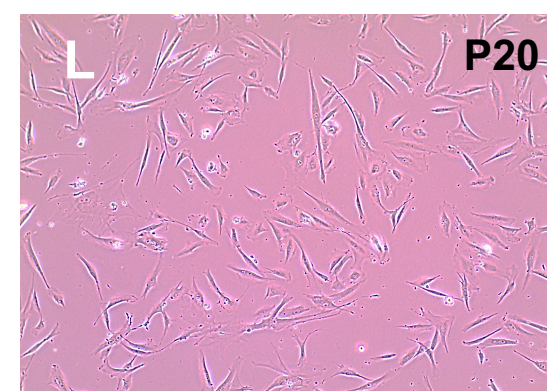

iMSCs

iOST

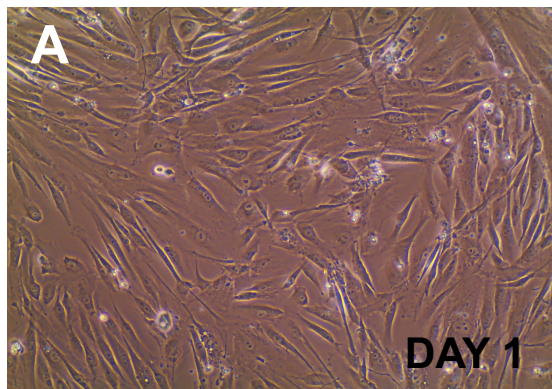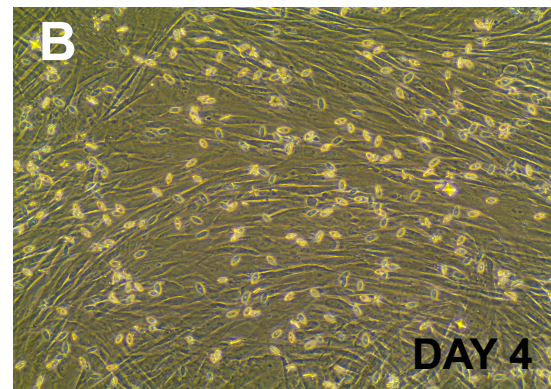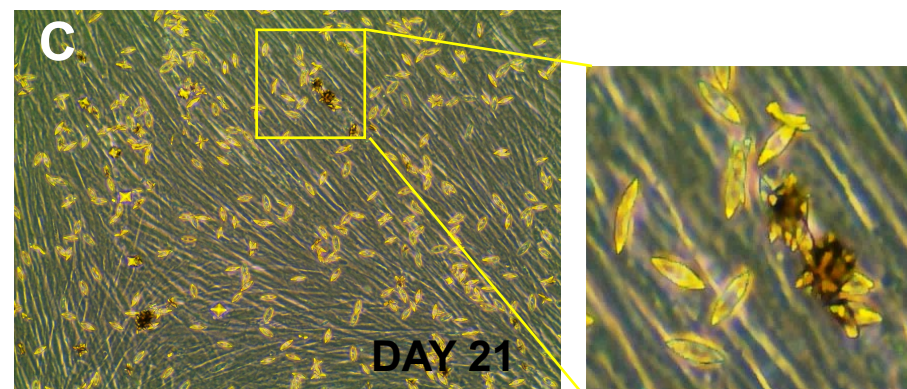

iCHON

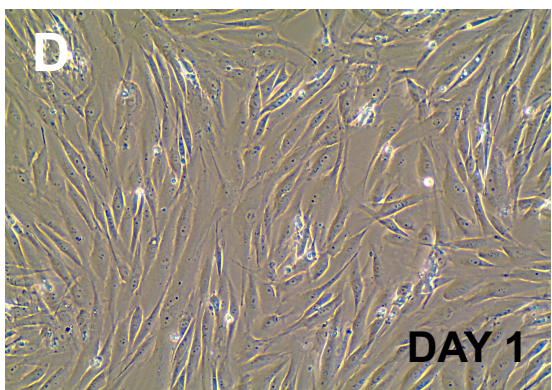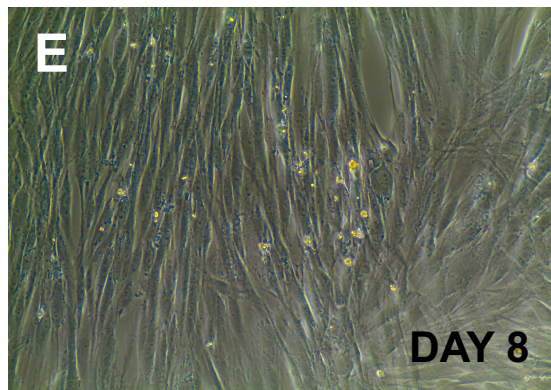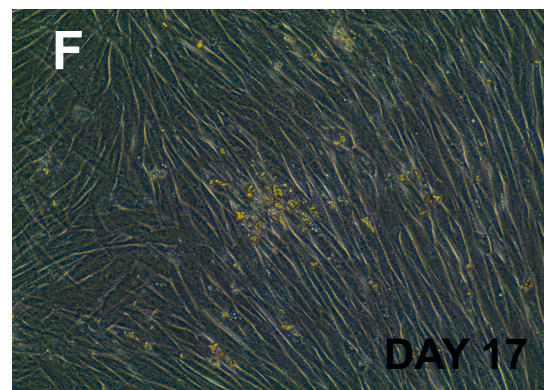

iADIPO

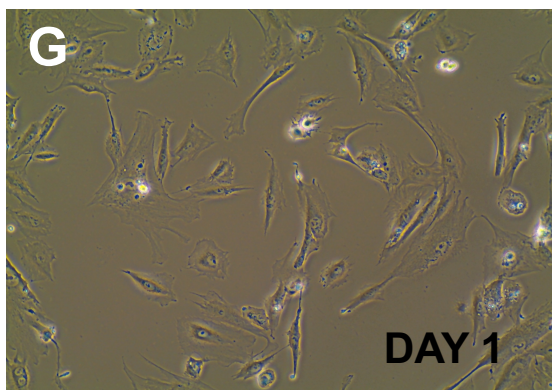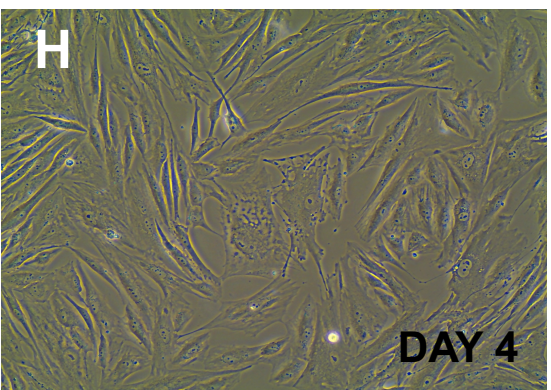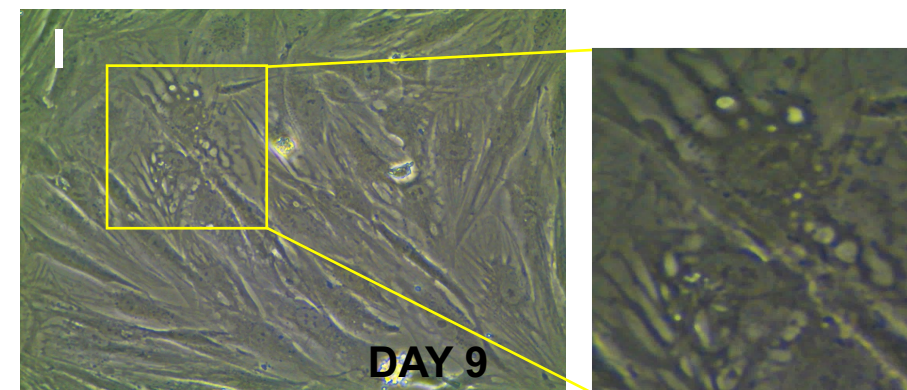

Supplementary Figure S3

**A**

**iMSC**

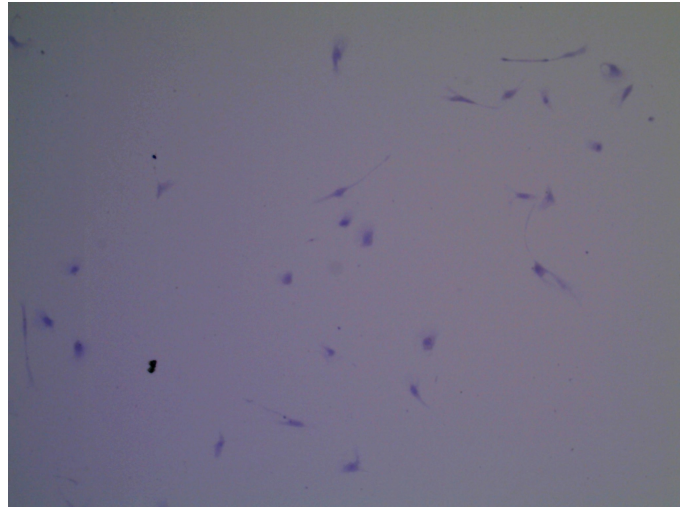

**UC-MSC**

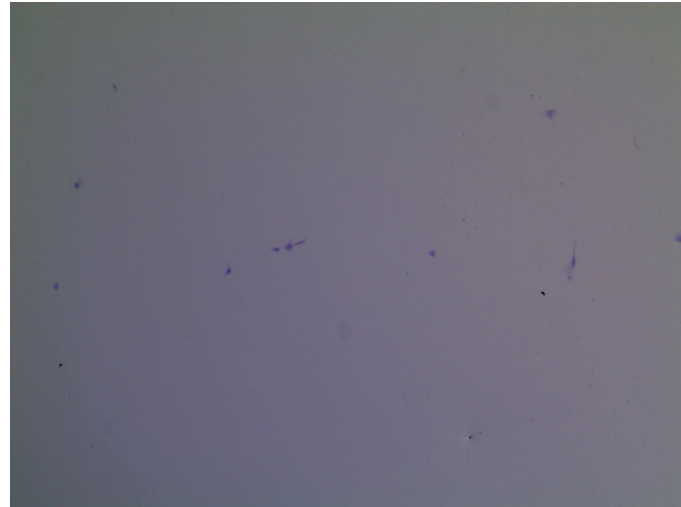

**B**

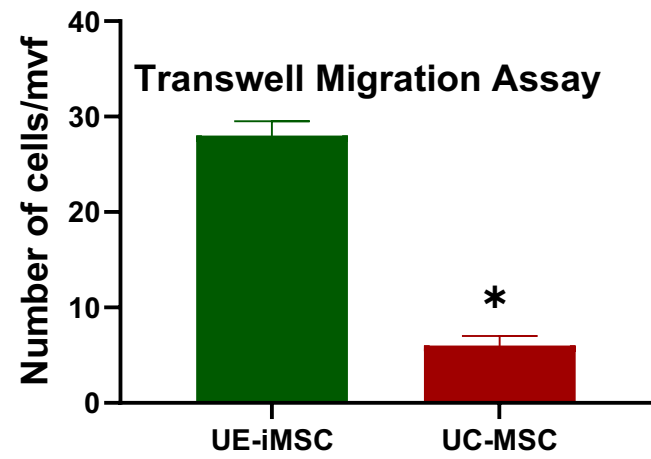

Supplement: JCMM-25-8904-s002.pdf [file JCMM-25-8904-s002.pdf]
