# Supplementary material for: Comparative analysis of human induced pluripotent stem cell‐derived mesenchymal stem cells and umbilical cord mesenchymal stem cells
Source: PubMed Central journal article supplement (PMC8435459; doi:10.1111/jcmm.16851), 2021-08-13
Supplement: JCMM-25-8904-s001.pdf [file JCMM-25-8904-s001.pdf]

## Online Supplementary Tables

**Supplementary Table 1. Details of antibodies used in this study**

| Gene       | Cat.#        | Company           | Used  |
|------------|--------------|-------------------|-------|
| SSEA4      | ASA-0150     | Applied Stem Cell | IF    |
| OCT3/4     | SC-5279      | Santa cruz        | IF,WB |
| SOX2       | SC-365964    | Santa cruz        | IF,WB |
| NANOG      | SC-293121    | Santa cruz        | IF,WB |
| OCT3/4     | 130-105-080  | Miltenyi Biotec   | FACS  |
| SOX2       | 130-104-993  | Miltenyi Biotec   | FACS  |
| NANOG      | 130-109-764  | Miltenyi Biotec   | FACS  |
| H3         | 9715         | cell signalling   | WB    |
| VECAD      | SC-8399      | Santa cruz        | IF    |
| AFP        | SC-8399      | Santa cruz        | WB    |
| NESTIN     | MAB1259      | R&D System        | WB    |
| ACTIN      | SC-1616      | Santa cruz        | WB    |
| CD73       | NBP2-48480SS | Novus Biologicals | IF    |
| CD90       | NBP2-66763   | Novus Biologicals | IF,WB |
| CD105      | NBAF1097     | Novus Biologicals | IF    |
| CD73       | SC-32299     | Santa cruz        | WB    |
| CD73-APC   | 130-112-061  | Miltenyi Biotec   | FACS  |
| CD90-PE    | 130-117-537  | Miltenyi Biotec   | FACS  |
| CD105-FITC | 130-112-327  | Miltenyi Biotec   | FACS  |
| CD34-FITC  | 11-034182    | eBioscience       | FACS  |
| CD45-PE    | 561087       | BD Bioscience     | FACS  |
| IgG_APC    | 405308       | Biologends        | FACS  |
| IgG_FITC   | 405305       | Biologends        | FACS  |
| IgG_PE     | 405307       | Biologends        | FACS  |
| CK19       | ab52625      | abcam             | IF    |
| ZO1        | SC-8147      | Santa cruz        | IF    |

| <b>Supplementary Table 2. SYBR Green Primer list</b> |                                   |                                 |
|------------------------------------------------------|-----------------------------------|---------------------------------|
| <b>Gene</b>                                          | <b>Forward</b>                    | <b>Reverse</b>                  |
| <b>18S rRNA</b>                                      | 5' -CTACCACATCCAAGGAAGCA- 3'      | 5' -TTTTTCGTCACCTCCCCG- 3'      |
| <b>OCT3/4</b>                                        | 5' -ACCCCTGGTGCCGTGAA- 3'         | 5' -GGCTGAATACCTTCCCAAATA- 3'   |
| <b>SOX2</b>                                          | 5' -CAGCGCATGGACAGTTAC- 3'        | 5' -GGAGTGGGAGGAAGAGGT- 3'      |
| <b>NANOG</b>                                         | 5' -AAAGGCAAACAACCCACT- 3'        | 5' -GCTATTCTTCGGCCAGTT- 3'      |
| <b>VECAD</b>                                         | 5' -CCTGATGCGGCTAGGCATA- 3'       | 5' -GGAAGAACTGGCCCTTGTC- 3'     |
| <b>CD31</b>                                          | 5' -TGTATTTCAAGACCTCTGTGCACTT- 3' | 5' -TTAGCCTGAGGAATTGCTGTGTT- 3' |
| <b>CD73</b>                                          | 5' -CAGTACCAGGGCACTATCTGG- 3'     | 5' -AGTGGCCCCTTTGCTTTAAT- 3'    |
| <b>CD90</b>                                          | 5' -ATGAACCTGGCCATCAGCA- 3'       | 5' -GTGTGCTCAGGCACCCC- 3'       |
| <b>CD105</b>                                         | 5' -CCACTAGCCAGGTCTCGAAG- 3'      | 5' -GATGCAGGAAGACACTGCTG- 3'    |
| <b>CD34</b>                                          | 5' -TCTTGGGCATCACTGGCTATT - 3'    | 5' -GCCCAGCCTTTCTCCTGTG- 3'     |
| <b>CD45</b>                                          | 5' -TGGTAAAAGCTCTACGCAAAGCT- 3'   | 5' -AGGGTAGGTGCTGGCAATGA- 3'    |
| <b>OSTEOCALCIN</b>                                   | 5' -ATGAGAGCCCTCACACTCCTC- 3'     | 5' -GCCGTAGAAGCGCCGATAGGC- 3'   |
| <b>COL2</b>                                          | 5' -GGCAATAGCAGGTTACGTACA- 3'     | 5' -CGATAACAGTCTTGCCCCACTT- 3'  |
| <b>ADIPONECTIN</b>                                   | 5' -AAGGAGATCCAGGTCTTATTGG- 3'    | 5' -ACCTTCAGCCCCGGGTAC- 3'      |
| <b>TSG6</b>                                          | 5' -TCACCTACGCAGAAGCTAAGGC- 3'    | 5' -TCCAACCTCTGCCCTTAGCCATC- 3' |
| <b>IL11</b>                                          | 5' -GGACCACAACCTGGATTCCCTG- 3'    | 5' -AGTAGGTCCGCTCGCAGCCTT- 3'   |
| <b>TGF-β</b>                                         | 5' -GCAGCACGTGGAGCTGTA- 3'        | 5' -CAGCCGTTGCTGAGGTA- 3'       |
| <b>IL6</b>                                           | 5' -AGACAGCCACTCACCTCTTCAG- 3'    | 5' -TTCTGCCAGTGCCTCTTTGCTG- 3'  |
| <b>IL1β</b>                                          | 5' -TGAGCTCGCCAGTGAAATGA- 3'      | 5' -AGATTCGTAGCTGGATGCCG- 3'    |
| <b>TNFα</b>                                          | 5' -CAGCCTCTTCTCCTTCCTGAT- 3'     | 5' -GCCAGAGGGCTGATTAGAGA- 3'    |

| <b>Supplementary Table: 3<br/>MSC taqman Primer list</b> |                  |
|----------------------------------------------------------|------------------|
| <b>Gene</b>                                              | <b>Primer_ID</b> |
| <b>18s</b>                                               | Hs03928985_g1    |
| <b>APOA1</b>                                             | Hs01040607_m1    |
| <b>AFP</b>                                               | Hs01040607_m1    |
| <b>MAP2</b>                                              | Hs00258900_m1    |
| <b>OLIG2</b>                                             | Hs00300164_s1    |

Table 3
